# Supplementary material for: Biodegradable pH-sensitive polyurethane micelles with different polyethylene glycol (PEG) locations for anti-cancer drug carrier applications
Source: Royal Society of Chemistry journal article supplement (doi:10.1039/c6ra20613a), 2016-01-01
Supplement: c6ra20613a1.pdf [file c6ra20613a1.pdf]

## Supporting Information

### Biodegradable pH-sensitive polyurethane micelles with different polyethylene glycol (PEG) location for anti-cancer drug carrier applications

Yongchao Yao, Deqiu Xu, Chang Liu, Yayuan Guan, Jiya Zhang, Yuling Su, Lili Zhao, Fancui Meng and

Jianbin Luo\*

College of Chemistry and Environmental Protection Engineering, Southwest University for

Nationalities, 610041 Sichuan, China

Tel: +86 28 6902063. Fax: +86 28 85522322

E-mail addresses: [luojb1971@163.com](mailto:luojb1971@163.com)

#### Synthesis

##### Scheme 1S

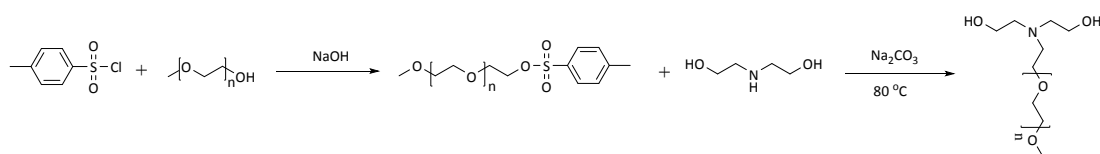

**Preparation of CH<sub>3</sub>(OCH<sub>2</sub>CH<sub>2</sub>)<sub>n</sub>OTs.<sup>1</sup>** A slurry of p-TsCl (3.813 g, 0.02mol), NaOH (1.6 g, 0.04mol) and MPEG (Mn=1000, 1 g, 0.01 mol) was pestled in a mortar for 30 min. The mixture was poured into CH<sub>2</sub>Cl<sub>2</sub> (400 mL) and the organic layer was washed with water (200 mL) and reduced to minimum volume by evaporation in vacuum. MPEG-OTs were thus prepared with at least 90% purity and were used as obtained in 92% yield. <sup>1</sup>H NMR (400 MHz, DMSO-*d*<sub>6</sub>, δ): 7.75 (d, *J* = 8 Hz, 2H), 7.45 (d, *J* = 8.4 Hz, 2H), 4.08 (t, *J* = 4 Hz, 2H), 3.54 (d, *J* = 4.4 Hz, 2H), 3.45 (m, 88H), 3.21 (s, 3H), 2.39 (s, 3H); MS (*m/z*): [186+44*n*+Na<sup>+</sup>].

**Preparation of PEGylated diethanolamine (MPEG-DEAM).<sup>1</sup>** Diethanolamine (5.25 g, 0.05 mol) and Na<sub>2</sub>CO<sub>3</sub> (2.9 g, 0.0275 mol) were placed in a three-necked, N<sub>2</sub>-flushed flask. This mixture was held at 80 °C while the MPEG-OTs (2.32 g 0.002 mol) was added over 2 h. The reaction mixture was stirred vigorously (80 °C) for 20 h and cooled to room temperature, CH<sub>2</sub>Cl<sub>2</sub> (100 mL) was added, and the salts were filtered and then washed with additional CH<sub>2</sub>Cl<sub>2</sub> (150 mL). The CH<sub>2</sub>Cl<sub>2</sub> was evaporated in vacuo. The crude MPEG-DEAM thus obtained and

was purified by Column chromatography (DCM /MeOH=20/1) to afford MPEG-DEAM as a white powder (1.31 g, 60%).  $^1\text{H}$  NMR (400 MHz,  $\text{CDCl}_3$ ,  $\delta$ ): 3.8-3.5 (m, 93H), 3.01 (s, 2H), 2.96 (s, 4H); MS (m/z):  $[119+44n+\text{H}^+]$ .

---

### Supplemental Figures

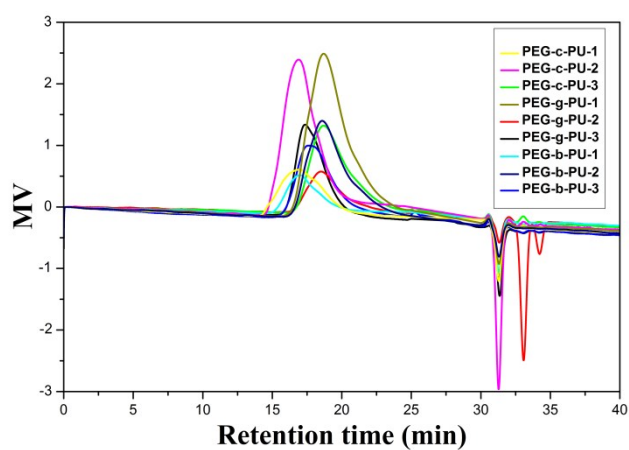

Fig. S1 GPC curves of purified PU

---

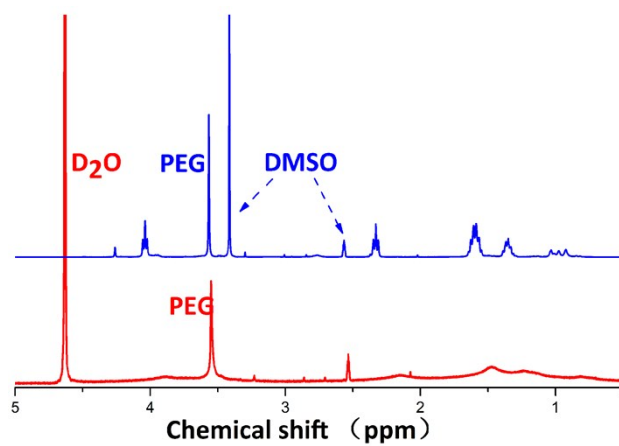

Fig. S2  $^1\text{H}$  NMR spectra of pH-sensitive polyurethane in  $\text{DMSO-d}_6$  and its micelles in  $\text{D}_2\text{O}$

---

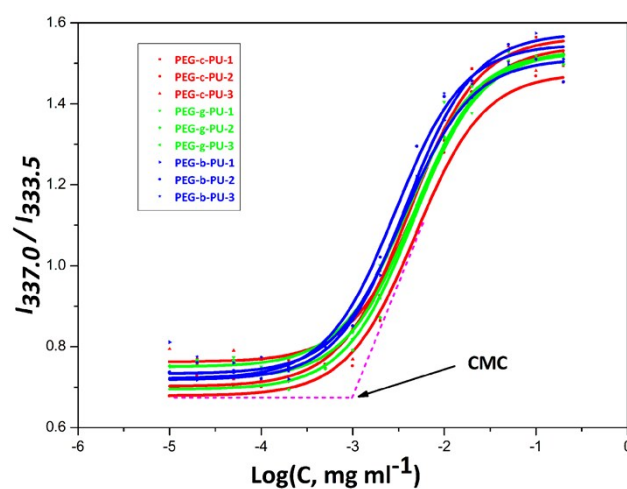

**Fig. S3**  $I_{337.0}/I_{333.5}$  ratios in the excitation spectra as a function of micellar concentrations (Log C), the CMCs are obtained from the intersection of the two tangent lines shown by the arrows.

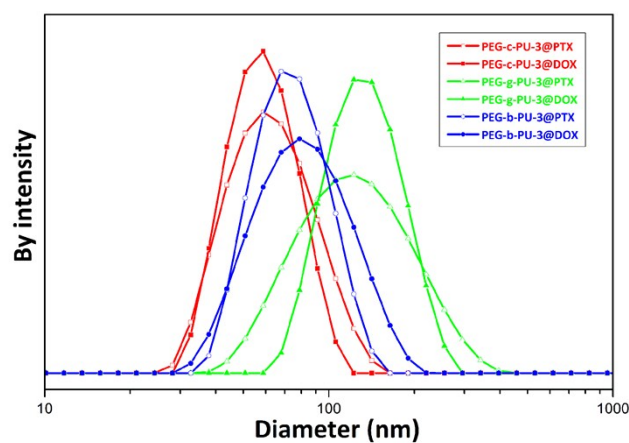

**Fig. S4** Size distribution of pH-sensitive polyurethanes determined by DLS

1. R. A. Schultz, B. D. White, D. M. Dishong, K. A. Arnold and G. W. Gokel, *Journal of the American Chemical Society*, 1985, **107**, 6659-6668.
